# Supplementary material for: Making sense of a pandemic: reasoning about COVID-19 in the intellectual dark web
Source: Frontiers journal article supplement (doi:10.3389/fsoc.2024.1374042), 2024-09-16
Supplement: Table_2.pdf [file Table_2.pdf]

**Supplementary Table 2: Full Topic Model Specification**

| Topic ID | Count | Top 20 Words                                                                                                                                                                                                         |
|----------|-------|----------------------------------------------------------------------------------------------------------------------------------------------------------------------------------------------------------------------|
| 0        | 14871 | wing, liberal, conservative, conservatives, progressive, liberals, leftist, progressives, leftists, liberalism, center, party, radical, conservatism, ideology, progressivism, centrist, leaning, progress, moderate |
| 1        | 12489 | vaccine, vaccines, covid, vaccinated, vaccination, immunity, effects, virus, infection, unvaccinated, effective, mandates, deaths, ivermectin, safe, pfizer, myocarditis, fda, disease, adverse                      |
| 2        | 10659 | gender, trans, sex, woman, transgender, biological, female, dysphoria, male, transition, binary, identity, construct, surgery, men, identify, cis, feminine, biology, hormones                                       |
| 3        | 11694 | podcast, interview, podcasts, episode, guests, listening, listened, interviews, rogan, audience, maher, conservative, talks, guest, topics, videos, youtube, episodes, jbp, smart                                    |
| 4        | 12210 | reply, respond, responding, responded, answered, replied, replying, insult, answering, insults, waste, responses, sentence, wow, engaging, glad, worries, explained, replies, ad                                     |
| 5        | 8046  | religion, religious, christian, christianity, church, religions, atheist, belief, bible, christians, atheists, atheism, supernatural, beliefs, catholic, gods, jesus, secular, universe, existence                   |
| 6        | 7944  | ivermectin, drug, treatment, doctors, medical, ivm, studies, covid, trials, doctor, medicine, fda, patients, study, clinical, horse, drugs, treatments, placebo, 19                                                  |
| 7        | 7629  | twitter, censorship, facebook, platform, platforms, speech, content, companies, users, private, 230, company, tech, banned, musk, parler, ban, elon, censor, online                                                  |
| 8        | 9143  | biden, president, obama, bernie, vote, election, candidate, 2016, polls, win, sanders, voting, democrats, voted, clinton, voters, hillary, supporters, party, dnc                                                    |
| 9        | 6360  | abortion, fetus, abortions, baby, pregnancy, pro, roe, birth, mother, child, pregnant, autonomy, personhood, body, woman, bodily, unborn, rights, conception, weeks                                                  |
| 10       | 5020  | russia, ukraine, putin, russian, nato, ukrainian, invasion, russians, crimea, military, ukrainians, west, sanctions, soviet, propaganda, invade, civilians, western, troops, nukes                                   |
| 11       | 6415  | fox, cnn, journalism, outlets, reporting, journalists, msnbc, mainstream, bias, npr, nyt, biased, outlet, msm, stories, journalist, press, propaganda, coverage, fake                                                |

|    |      |                                                                                                                                                                                                           |
|----|------|-----------------------------------------------------------------------------------------------------------------------------------------------------------------------------------------------------------|
| 12 | 6248 | riots, protests, capitol, protest, peaceful, riot, rioters, protesters, rioting, violence, insurrection, police, blm, violent, protestors, looting, protesting, portland, 6th, jan                        |
| 13 | 9167 | racism, racist, systemic, race, racial, whites, color, blacks, racists, skin, discrimination, americans, african, races, minorities, prejudice, outcomes, asians, kendi, supremacy                        |
| 14 | 3940 | woke, wokeness, wokeism, ideology, wakes, religion, movement, racism, wokism, liberal, justice, racist, progressive, religious, wing, identity, conservatives, cult, cultural, race                       |
| 15 | 4449 | aoc, tulsi, omar, fired, disney, pelosi, gabbard, greta, israel, twitter, tweet, party, semitic, shes, speech, carano, hillary, interview, tweets, jews                                                   |
| 16 | 3978 | climate, carbon, warming, emissions, energy, co2, nuclear, global, fossil, solar, green, scientists, science, fuels, temperature, wind, earth, ipcc, planet, greenhouse                                   |
| 17 | 4085 | peterston, jordan, zizek, marxism, marxist, jp, harris, religion, dr, marxists, lectures, psychology, postmodernism, postmodern, jbp, sam, talks, fans, christian, interview                              |
| 18 | 3399 | china, chinese, ccp, taiwan, genocide, hong, kong, xinjiang, xi, camps, communist, mao, han, west, trade, western, countries, prc, uighur, uighurs                                                        |
| 19 | 4342 | science, scientific, scientists, consensus, experts, scientist, sciences, research, method, field, trust, expert, peer, fields, etica, studies, papers, academia, scientism, sociology                    |
| 20 | 4341 | police, crime, blacks, cops, crimes, killed, violent, racism, commit, whites, policing, rates, racial, race, statistics, disproportionately, brutality, officers, rate, shootings                         |
| 21 | 4610 | election, fraud, ballots, votes, mail, voter, ballot, voting, elections, vote, counted, counting, stolen, rigged, voters, results, biden, fraudulent, audit, georgia                                      |
| 22 | 4793 | fbi, investigation, documents, mueller, russian, president, russia, campaign, election, clinton, impeachment, warrant, biden, classified, report, hillary, collusion, assange, investigations, corruption |
| 23 | 2776 | gun, guns, shootings, mass, amendment, weapons, firearms, shooting, firearm, rifles, armed, arms, ownership, 2a, militia, laws, rifle, violence, school, 2nd                                              |
| 24 | 3941 | speech, freedom, amendment, protected, censorship, rights, consequences, expression, violence, laws, fire, legal, private, crowded, censor, hateful, harm, misinformation, 1a, 1st                        |

|    |      |                                                                                                                                                                                                                 |
|----|------|-----------------------------------------------------------------------------------------------------------------------------------------------------------------------------------------------------------------|
| 25 | 3232 | race, genetic, races, differences, genetics, ancestry, populations, skin, traits, genes, biological, racial, construct, color, categories, african, species, genetically, subspecies, variation                 |
| 26 | 3808 | market, private, companies, corporations, monopolies, markets, regulation, monopoly, company, regulations, gov, profit, sector, competition, monarchy, businesses, governments, corporation, profits, corporate |
| 27 | 3812 | diversity, affirmative, discrimination, hiring, race, applicants, racial, students, quotas, minorities, admissions, training, whites, names, asians, asian, hire, qualified, color, minority                    |
| 28 | 2626 | iq, intelligence, scores, differences, cognitive, genetic, test, tests, gap, average, race, genetics, murray, measure, racial, intelligent, curve, bell, factors, environmental                                 |
| 29 | 2348 | masks, mask, wearing, wear, cloth, mandates, n95, surgical, transmission, spread, covid, droplets, masking, particles, effective, virus, cdc, studies, pandemic, study                                          |
| 30 | 3021 | university, universities, students, academia, professors, professor, college, campus, faculty, academic, education, student, colleges, humanities, academics, conservative, liberal, school, institutions, stem |
| 31 | 2162 | cancel, cancelled, boycott, canceled, cancelling, cancellation, boycotts, canceling, fired, boycotting, company, mob, dixie, chicks, speech, twitter, goodyear, cancellations, firing, conservatives            |
| 32 | 2335 | slavery, slaves, slave, 1619, enslaved, project, chattel, trade, south, colonies, somerset, africans, owners, african, civil, reparations, africa, jefferson, indentured, plantation                            |
| 33 | 3830 | banned, mods, ban, subs, subreddit, mod, users, banning, block, subreddits, bans, moderators, user, blocked, moderator, posting, brigading, blocking, trolls, content                                           |
| 34 | 2316 | healthcare, insurance, health, medicare, costs, pay, doctors, cost, medical, universal, socialized, private, payer, market, doctor, hospital, medicaid, afford, services, canada                                |
| 35 | 2560 | shapiro, ben, rubin, partisan, conservative, pakman, wing, harris, peterson, political, seder, sam, crowder, marriage, dave, interview, conservatives, rogan, podcast, daily                                    |
| 36 | 2650 | marxism, marx, marxist, marxists, capitalism, cultural, revolution, communism, communist, capitalist, socialism, neo, ideology, proletariat, economic, production, blm, socialist, labor, communists            |
| 37 | 2681 | peer, study, studies, review, research, reviewed, paper, papers, journals, published, meta, journal, scientific, science, reviewers, conclusions, publish, methodology, findings, results                       |

|    |      |                                                                                                                                                                                                                 |
|----|------|-----------------------------------------------------------------------------------------------------------------------------------------------------------------------------------------------------------------|
| 38 | 1948 | movie, movies, disney, characters, bond, film, character, hollywood, films, netflix, woke, marvel, star, idris, james, elba, cast, actor, actors, female                                                        |
| 39 | 1887 | bret, brett, weinstein, heather, eric, unity, evergreen, podcast, ballot, dawkins, dhs, sam, matt, plan, unity2020, evolutionary, audience, brets, grifter, ticket                                              |
| 40 | 2742 | rubin, member, eric, weinstein, membership, ideologies, harris, conversations, rogan, sam, dave, topics, club, content, subreddit, peterson, shapiro, discussions, figures, movement                            |
| 41 | 2742 | conspiracy, theories, theorist, theorists, qanon, conspiracies, cia, hoax, 11, secret, conspiratorial, moon, cabal, mainstream, ufo, aliens, landing, believing, fake, trust                                    |
| 42 | 2355 | statistics, coin, numbers, stats, sample, graph, statistical, 50, correlation, percentage, population, chart, estimates, 70, size, percent, survey, heads, statistic, average                                   |
| 43 | 1990 | inflation, banks, currency, bitcoin, fed, loans, supply, debt, dollar, reserve, crypto, bank, printing, economy, gold, monetary, market, prices, financial, fiat                                                |
| 44 | 2558 | rittenhouse, kyle, gun, shot, defense, police, shooting, officer, shoot, arrest, shooter, weapon, cops, rifle, officers, armed, rosenbaum, murder, knock, car                                                   |
| 45 | 2173 | nazis, nazi, hitler, nazism, germany, german, germans, jews, reich, socialists, party, national, socialist, jewish, neo, ideology, adolf, evil, socialism, aryan                                                |
| 46 | 2388 | language, definitions, dictionary, english, meanings, usage, languages, semantics, define, dictionaries, linguistic, describe, vocabulary, changing, phrase, webster, defined, communicate, linguistics, labels |
| 47 | 1590 | israel, palestinians, israeli, palestinian, palestine, jews, arab, hamas, jewish, arabs, israelis, land, gaza, apartheid, peace, egypt, occupation, 1967, bank, conflict                                        |
| 48 | 3587 | racist, nationalist, supremacist, nationalists, supremacy, racism, nationalism, supremacists, racists, race, obama, whites, racial, molyneux, stefan, president, whiteness, kkk, nazi, spencer                  |
| 49 | 1933 | mental, autism, illness, depression, disorder, diagnosis, autistic, health, trauma, therapy, disorders, psychology, diagnosed, mentally, psychiatry, therapist, schizophrenia, adhd, psychosis, personality     |
| 50 | 2058 | rubin, dave, guests, rogan, seder, shapiro, interview, pakman, guest, joe, grifter, interviewer, interviews, alt, platform, audience, sam, peterson, criticism, patreon                                         |

|    |      |                                                                                                                                                                                                          |
|----|------|----------------------------------------------------------------------------------------------------------------------------------------------------------------------------------------------------------|
| 51 | 1626 | joe, rogan, spotify, podcast, guests, episodes, jre, alex, jones, joerogan, guest, bernie, mma, episode, cnn, interview, jack, comedian, fans, audience                                                  |
| 52 | 2101 | immigration, immigrants, border, borders, illegal, immigrant, migrants, replacement, asylum, migration, refugees, undocumented, ice, countries, mexico, wall, native, population, citizens, sanctuary    |
| 53 | 3301 | burden, assertion, proven, provided, anecdotal, feelings, assertions, conclusion, presented, dismissed, convince, proves, factual, proving, counter, disprove, statements, providing, reasoning, logical |
| 54 | 4098 | echo, subs, chamber, subreddit, wing, leaning, conservative, chambers, subreddits, leftist, downvoted, leftists, content, upvotes, conservatives, mods, discussions, posting, users, space               |
| 55 | 2045 | book, books, recommend, moloch, fiction, haidt, author, novel, audiobook, coddling, philosophy, chapter, recommended, maps, writing, series, jonathan, novels, righteous, recommendation                 |
| 56 | 1378 | sports, athletes, compete, trans, sport, female, men, mma, advantage, biological, male, testosterone, leagues, competing, team, players, soccer, competition, league, woman                              |
| 57 | 1729 | islam, muslims, muslim, islamic, quran, religion, christianity, christians, christian, sharia, cartoons, religious, religions, muhammad, mohammed, islamophobia, allah, western, west, europe            |
| 58 | 2628 | morality, evil, suffering, immoral, morals, ethics, values, objective, ethical, morally, subjective, ought, nature, happiness, humans, pain, pleasure, altruism, harm, empathy                           |
| 59 | 2167 | videos, watched, youtube, watching, clip, minutes, audio, posted, content, title, bhi, minute, channel, hour, clips, documentary, tube, propaganda, speed, mins                                          |
| 60 | 1464 | pronouns, pronoun, singular, gender, preferred, language, refer, plural, english, trans, male, gendered, female, sex, binary, sir, referred, woman, grammar, xe                                          |
| 61 | 1523 | fascism, fascist, fascists, mussolini, eco, authoritarian, communism, socialism, ur, italy, nationalism, hitler, umberto, dictator, italian, ideology, nazi, nazis, totalitarian, authoritarianism       |
| 62 | 1761 | marriage, gay, married, sex, parents, couples, sexual, marriages, religious, kids, marry, rights, bill, sexuality, child, lgbt, homosexuality, orientation, teachers, legal                              |
| 63 | 1521 | lab, leak, wuhan, virus, sars, cov, research, viruses, function, gain, bats, china, bat, fauci, origin, coronaviruses, coronavirus, virology, hypothesis, wiv                                            |

|    |      |                                                                                                                                                                                                                  |
|----|------|------------------------------------------------------------------------------------------------------------------------------------------------------------------------------------------------------------------|
| 64 | 1612 | libertarian, libertarians, libertarianism, liberty, freedom, party, authoritarian, liberal, liberalism, rand, market, private, nap, wing, taxes, conservatives, rights, economic, conservative, anarchism        |
| 65 | 1776 | countries, eu, canada, europe, globalization, usa, european, americans, uk, canadian, brexit, nations, nation, united, canadians, western, norway, quebec, north, south                                          |
| 66 | 1684 | harris, sam, podcast, klein, tds, islam, murray, weinstein, peterson, fan, jbp, charles, meditation, listened, seder, derangement, religion, episode, chomsky, clip                                              |
| 67 | 1922 | socialism, socialist, capitalism, socialists, capitalist, production, ownership, communism, economy, democratic, economic, democracy, workers, countries, market, private, bernie, worker, welfare, owned        |
| 68 | 1688 | tax, taxes, taxation, theft, income, pay, taxed, rich, wealth, paying, revenue, property, rate, paid, wealthy, sales, vat, spending, taxing, rates                                                               |
| 69 | 1463 | jews, jewish, semitism, semitic, jew, israel, antisemitism, judaism, semite, antisemitic, bolshevism, semites, christians, conspiracy, baddiel, ethnic, religion, religious, christian, holocaust                |
| 70 | 1562 | equality, opportunity, equity, outcome, equal, meritocracy, merit, outcomes, fairness, opportunities, inequality, unequal, meritocratic, unfair, discrimination, achieve, education, born, inequalities, parents |
| 71 | 3012 | men, feminism, feminists, feminist, patriarchy, male, masculinity, toxic, female, gender, woman, equality, roles, sexual, sexist, sexism, masculine, rights, feminine, males                                     |
| 72 | 1134 | eric, weinstein, portal, podcast, thiel, episode, sean, physics, peter, disc, brother, weinsteins, bret, sam, keefe, physicists, listening, geometric, lex, talks                                                |
| 73 | 1621 | communism, communist, communists, capitalism, ussr, socialism, capitalist, soviet, utopia, marx, socialist, dictatorship, ideology, revolution, authoritarian, economic, production, stalin, china, countries    |
| 74 | 3350 | virus, flu, covid, deaths, spread, lockdowns, pandemic, disease, immunity, lockdown, infected, measures, rate, hospitals, health, death, herd, infection, 19, die                                                |
| 75 | 1032 | strike, charity, strikes, ban, removed, principle, applying, permanent, mischaracterizing, willfully, insults, charitable, brigading, trolling, third, debatelording, permaban, content, temp, attacks           |

|    |      |                                                                                                                                                                                                                           |
|----|------|---------------------------------------------------------------------------------------------------------------------------------------------------------------------------------------------------------------------------|
| 76 | 1932 | police, cops, officers, cop, policing, officer, enforcement, defund, crime, training, defunding, force, unions, reform, violent, accountability, arrest, departments, brutality, violence                                 |
| 77 | 1218 | jones, alex, defamation, sandy, damages, hook, libel, trial, court, discovery, aj, jury, default, families, infowars, plaintiffs, sued, slander, lies, parents                                                            |
| 78 | 986  | drag, sexual, pageants, kids, queens, queen, child, sexualized, beauty, friendly, dress, dressing, kid, adult, performances, dancing, inherently, performance, burlesque, makeup                                          |
| 79 | 1837 | objective, subjective, perception, truths, objectively, illusion, perceive, philosophy, existence, constructed, physical, concept, realism, shared, belief, universe, coherence, experiences, correspondence, perceptions |
| 80 | 2697 | crt, race, racism, racial, supremacy, racist, color, delgado, taught, whiteness, lens, teaching, stefancic, schools, whites, students, school, theorists, scholars, legal                                                 |
| 81 | 1245 | sam, seder, podcast, tds, samharris, episode, clip, dtg, rubin, dave, crowder, meditation, sams, listened, tribal, criticism, thinks, tribalism, ezra, bin                                                                |
| 82 | 1845 | gay, lgbt, sexual, homosexuality, orientation, queer, homosexual, sexuality, lgbtq, homophobic, straight, preference, sex, attracted, homophobia, heterosexual, born, gender, attraction, phobia                          |
| 83 | 1047 | books, book, library, seuss, libraries, publisher, publishing, publish, amazon, banning, publishers, dr, school, banned, burning, nea, mein, published, kampf, schools                                                    |
| 84 | 1034 | floyd, chauvin, neck, george, knee, death, died, autopsy, police, fentanyl, arrest, examiner, breathe, murder, killed, restraint, choke, cops, officer, overdose                                                          |
| 85 | 1157 | drugs, drug, alcohol, weed, marijuana, heroin, addiction, cocaine, legalization, meth, addicts, cannabis, fentanyl, substances, dealers, crack, illegal, possession, opium, prohibition                                   |
| 86 | 1212 | joke, satire, comedy, sarcasm, jokes, funny, humor, sarcastic, comedians, parody, mocking, joking, laugh, humour, mockery, laughing, hilarious, laughed, poe, satirical                                                   |
| 87 | 954  | taliban, afghanistan, afghan, military, withdrawal, troops, kabul, biden, afghans, equipment, syria, leaving, soldiers, army, forces, civilians, botched, pakistan, afghani, evacuation                                   |
| 88 | 1068 | id, voter, voting, ids, vote, laws, voters, fraud, ballot, polling, elections, mail, election, georgia, photo, requiring, hours, water, registration, license                                                             |

|     |      |                                                                                                                                                                                                                                  |
|-----|------|----------------------------------------------------------------------------------------------------------------------------------------------------------------------------------------------------------------------------------|
| 89  | 1386 | privilege, privileged, privileges, whites, advantages, skin, advantage, concept, color, race, racial, disadvantage, born, whiteness, wealth, racism, intersectionality, racist, blacks, guilt                                    |
| 90  | 3470 | party, democrats, republicans, republican, dems, gop, democrat, democratic, parties, vote, voters, biden, policies, election, voting, obama, dnc, dem, platform, politicians                                                     |
| 91  | 1459 | rights, natural, property, constitution, liberty, locke, amendment, laws, freedom, violated, contract, inalienable, shall, healthcare, concept, bill, legal, water, protect, constitutional                                      |
| 92  | 1255 | antifa, proud, boys, organization, violence, fascist, supremacists, fascists, blm, nazis, fascism, violent, supremacist, charlottesville, portland, prayer, patriot, organized, gavin, rally                                     |
| 93  | 1613 | subreddit, subreddits, redditor, subs, users, redditors, karma, mods, downvote, red, upvotes, ruqqus, user, mod, site, downvoting, ant, admins, commenting, 4chan                                                                |
| 94  | 889  | web, dark, dialogue, weinstein, eric, refers, space, spanning, growing, peterson, harris, jordan, coined, held, mainstream, sam, variety, collection, subreddit, rogan                                                           |
| 95  | 1778 | democracy, democratic, republic, representative, vote, constitution, democracies, representatives, tyranny, voting, citizens, minority, elected, sortition, elections, governance, decisions, constitutional, oligarchy, consent |
| 96  | 1798 | deaths, covid, death, died, rate, numbers, excess, dying, mortality, die, 19, age, per, 000, million, cdc, hospital, vaccinated, unvaccinated, disease                                                                           |
| 97  | 1310 | kids, parents, child, parenting, adults, age, adult, parent, kid, 18, adulthood, young, abuse, development, 25, maturity, teach, childhood, hitting, wife                                                                        |
| 98  | 1354 | violence, violent, physical, speech, aggression, anger, harm, force, threats, assault, threat, aggressive, punch, abuse, language, incitement, silence, harmful, destructive, hurt                                               |
| 99  | 979  | strawman, straw, steelman, steel, manning, strawmanning, steelmanning, motte, bailey, rephrase, fallacy, strawmen, fallacies, strawmanned, logical, whataboutism, weak, opponent, attacking, strongest                           |
| 100 | 1062 | actor, actors, engaging, accuse, hasan, accusing, intentions, intent, hominem, ad, respond, troll, operating, derail, responding, assumption, discussions, dialogue, accusations, lying                                          |
| 101 | 2005 | capitalism, capitalist, market, profit, economic, markets, capital, production, labor, economy, capitalists, workers, property, wealth, private, socialism, communism, ownership, growth, worker                                 |



|     |      |                                                                                                                                                                                                                           |
|-----|------|---------------------------------------------------------------------------------------------------------------------------------------------------------------------------------------------------------------------------|
| 102 | 1300 | identity, identities, idpol, race, racial, identify, individualism, intersectionality, focus, christian, labels, minorities, gender, party, color, divide, progressive, immutable, interests, ideology                    |
| 103 | 1234 | blm, movement, organization, alm, police, slogan, brutality, protests, blacks, mlk, marxist, violence, racism, racist, racial, supporting, protest, rioting, phrase, communities                                          |
| 104 | 707  | yang, andrew, ubi, bernie, tulsi, candidate, gabbard, candidates, mcraeven, vote, biden, warren, party, win, sanders, democratic, ticket, dem, endorsed, primary                                                          |
| 105 | 763  | attractive, beauty, makeup, beautiful, fat, sexual, attractiveness, wear, men, fashion, ideal, ugly, woman, body, swimsuit, workplace, magazine, magazines, standards, skinny                                             |
| 106 | 1241 | solution, solutions, solve, fix, solved, solving, alternative, fixing, propose, solves, fixed, consequences, proposed, variables, solvable, viable, plan, soluble, redlining, problematic                                 |
| 107 | 1084 | court, justices, supreme, judges, thomas, packing, courts, scotus, garland, judicial, justice, senate, constitution, judge, mcconnell, congress, republicans, democrats, recuse, filibuster                               |
| 108 | 923  | youtube, videos, content, crowder, channels, algorithm, channel, creators, maza, youtubers, platform, google, alt, ads, users, speech, algorithms, advertisers, recommendations, misinformation                           |
| 109 | 1016 | california, rural, texas, cities, blue, red, urban, areas, city, ca, tx, florida, californians, housing, austin, population, counties, vote, moving, area                                                                 |
| 110 | 851  | consciousness, conscious, brain, agency, determinism, universe, choices, deterministic, physics, physical, illusion, decisions, predetermined, existence, decision, randomness, sam, quantum, brains, body                |
| 111 | 1015 | rape, consent, sexual, assault, raped, accusations, victims, sex, woman, drunk, victim, men, rapes, accused, rapist, harassment, assaulted, rapists, accusation, sexually                                                 |
| 112 | 738  | loans, debt, loan, student, college, tuition, forgiveness, education, pay, bankruptcy, colleges, students, universities, degrees, cost, paid, paying, costs, school, financial                                            |
| 113 | 968  | analogy, comparison, oranges, apples, compare, comparing, distinction, equivalence, differences, similarities, comparable, equivalent, comparisons, baseball, analogies, analogous, hole, compared, semantics, situations |
| 114 | 989  | genocide, camps, genocides, concentration, gulag, gulags, genocidal, ethnic, famine, prisoners, 000, armenian, camp, yugoslavia, atrocities, destruction, killed, lemkin, killing, nazi                                   |

|     |      |                                                                                                                                                                                                                                      |
|-----|------|--------------------------------------------------------------------------------------------------------------------------------------------------------------------------------------------------------------------------------------|
| 115 | 891  | mrna, gene, vaccines, protein, therapy, spike, vaccine, dna, cells, proteins, rna, immune, virus, malone, technology, cell, body, vector, nucleus, effects                                                                           |
| 116 | 1511 | ubi, welfare, programs, income, yang, vat, tax, program, poverty, taxes, pay, benefits, jobs, spending, economy, net, month, assistance, 1000, unemployment                                                                          |
| 117 | 1117 | historical, historians, taught, historian, zinn, events, teaching, books, slavery, learning, school, generations, ancient, crt, teach, repeat, ancestors, mistakes, hitler, 1984                                                     |
| 118 | 1415 | physics, universe, quantum, materialism, material, science, scientific, mechanics, simulation, theories, consciousness, model, popper, metaphysical, gravity, induction, models, metaphysics, epistemology, wave                     |
| 119 | 622  | tim, pool, rubin, crowder, wing, liberal, videos, dave, grifter, parkman, journalist, audience, joe, journalism, winger, poole, commentary, commentator, leaning, rogan                                                              |
| 120 | 1387 | party, parties, vote, voting, third, candidates, candidate, 3rd, votes, voters, election, ranked, duopoly, win, elections, electoral, primaries, unity, voted, republican                                                            |
| 121 | 683  | music, song, hop, hip, rap, songs, art, lyrics, cardi, wap, artists, musicians, pop, rapists, rock, artist, rappers, musical, rapist, musician                                                                                       |
| 122 | 1048 | automation, jobs, labor, automated, ubi, workers, ai, productivity, robots, unemployment, technology, machines, economy, hours, demand, worker, industries, production, workforce, labour                                            |
| 123 | 2216 | wealth, inequality, rich, income, poverty, mobility, wealthy, middle, economic, gap, billionaires, economy, richer, capital, bottom, lower, tax, distribution, born, bezos                                                           |
| 124 | 650  | jp, jbp, fans, jps, lectures, religion, psychology, fan, believes, kb, advice, philosophy, atheist, criticism, daughter, listening, listened, subreddit, trunks, jung                                                                |
| 125 | 1350 | schools, school, education, teachers, kids, students, teacher, parents, teaching, funding, teach, student, curriculum, math, charter, schooling, private, learning, taught, district                                                 |
| 126 | 999  | postmodernism, modernism, postmodern, postmodernist, modernist, philosophy, marxism, postmodernists, neo, marxist, foucault, modernists, enlightenment, narratives, grand, frankfurt, ideology, objective, pluckrose, metanarratives |
| 127 | 3976 | conversations, debates, discussions, discourse, debating, beliefs, dialogue, discuss, disagreement, topics, productive, emotional, logical, engaging, positions, online, win, opposing, opponent, communication                      |

|     |      |                                                                                                                                                                                                                                            |
|-----|------|--------------------------------------------------------------------------------------------------------------------------------------------------------------------------------------------------------------------------------------------|
| 128 | 589  | google, search, results, duckduckgo, engine, engines, bing, algorithm, algorithms, searches, ddg, image, damore, images, knife, blake, duck, daisy, suggestions, apple                                                                     |
| 129 | 1083 | evolution, evolutionary, species, biology, nature, humans, lobsters, selection, genes, environment, hierarchies, biological, genetic, natural, evolved, animals, gene, serotonin, nurture, apes                                            |
| 130 | 1382 | iran, iraq, saudi, saddam, arabia, nuclear, iranian, military, invasion, weapons, yemen, syria, regime, saudis, oil, foreign, region, east, sanctions, isis                                                                                |
| 131 | 1119 | fired, employer, employees, company, employee, fire, firing, employers, employment, workplace, speech, boss, companies, freedom, jobs, harassment, lose, hr, hire, religious                                                               |
| 132 | 693  | driving, drunk, seatbelt, car, trolley, drive, cars, seatbelts, seat, drivers, driver, belt, safety, accidents, speed, accident, wear, traffic, road, wearing                                                                              |
| 133 | 545  | epstein, maxwell, jeffrey, pinker, dershowitz, suicide, pedophile, clinton, acosta, blackmail, island, powerful, ghislaine, trial, pedo, conspiracy, flight, jane, underage, girls                                                         |
| 134 | 609  | obesity, fat, obese, overweight, weight, healthy, health, exercise, food, diabetes, bmi, diet, eat, unhealthy, heart, disease, covid, eating, sugar, contagious                                                                            |
| 135 | 938  | murder, penalty, death, killing, kill, punishment, prison, innocent, murderers, killed, execution, murderer, crime, executed, justice, guilty, murdered, executions, homicide, alive                                                       |
| 136 | 842  | dating, men, promiscuous, sex, apps, partners, incel, attractive, relationships, incels, sexual, relationship, casual, partner, date, promiscuity, tinder, males, woman, hypergamy                                                         |
| 137 | 1256 | court, courts, legal, supreme, judge, ruling, precedent, lawsuit, lawsuits, decision, judges, dismissed, scotus, lawyer, persky, lawyers, rulings, judicial, overturned, constitutional                                                    |
| 138 | 1266 | lie, lying, lies, lied, liar, liars, fauci, deception, dishonest, trust, caught, tells, oath, admitted, accusations, deer, quote, stories, believing, factual                                                                              |
| 139 | 1241 | intellectuals, intellectualism, intellectually, intellectualdarkweb, intelligence, intelligent, wisdom, pseudo, intellect, smart, subreddit, thinkers, ignorance, awareness, dishonest, smarter, academic, educated, discourse, philosophy |
| 140 | 1092 | men, female, gender, stem, male, gap, fields, sexism, career, differences, workforce, jobs, roles, woman, pay, 50, discrimination, girls, engineering, equality                                                                            |

|     |      |                                                                                                                                                                                                                              |
|-----|------|------------------------------------------------------------------------------------------------------------------------------------------------------------------------------------------------------------------------------|
| 141 | 653  | tribalism, tribe, tribal, tribes, tribalistic, identity, oxytocin, humans, tribalist, gun, collective, ethnic, nature, instincts, beliefs, identities, communities, indian, subreddit, blue                                  |
| 142 | 551  | tucker, carlson, oliver, fox, maddow, john, viewers, greenwald, immigration, 2017, replacement, nyt, rachel, racist, conservative, immigrants, nationalist, whistles, stewart, dirtier                                       |
| 143 | 703  | civil, military, armed, unrest, conflict, violence, army, wars, tanks, militia, warfare, militias, factions, uprising, weapons, fighting, domestic, guerrilla, guns, antifa                                                  |
| 144 | 684  | anarchist, anarchism, anarchy, anarchists, bookchin, anarcho, communalism, hierarchies, communalist, hierarchy, communes, institutions, libertarian, assemblies, ecological, capitalism, statist, zapatistas, forms, commune |
| 145 | 949  | scared, afraid, mongering, paranoid, fears, scary, scare, paranoia, panic, threat, terrified, fearmongering, worry, terrifying, worried, fearful, trust, covid, safe, danger                                                 |
| 146 | 723  | sex, sexual, minors, prostitution, consent, pedophilia, porn, child, stigma, pedophiles, trafficking, boss, abuse, pedophile, rape, adults, attracted, consenting, minor, workplace                                          |
| 147 | 562  | pakman, david, progressive, rubin, pool, seder, shapiro, progressives, kulinski, tim, dore, fans, crowder, partisan, interview, india, content, youtube, videos, kyle                                                        |
| 148 | 485  | meat, vegan, diet, eat, vegans, veganism, eating, animal, food, vegetarian, animals, foods, diets, cattle, beef, plant, nutrients, vegetables, protein, cows                                                                 |
| 149 | 1165 | cultures, cultural, appropriation, pride, values, proud, european, western, differences, culturally, nations, americans, immigrants, norms, ethnic, music, shared, asian, customs, traditions                                |
| 150 | 832  | troll, trolling, trolls, bye, trolled, blocked, feed, actor, mods, posting, engaging, waste, provoke, user, baiting, bait, malice, responding, deliberately, insults                                                         |
| 151 | 531  | ben, neil, shapiro, interview, interviewer, partisan, andrew, marriage, politcal, conservative, bbc, daily, rush, wing, immoral, gay, dave, style, rubin, podcast                                                            |
| 152 | 519  | flag, confederate, symbol, flags, fly, confederacy, burning, symbols, flying, swastika, southerners, represents, slavery, southern, south, racist, rebel, pride, burn, nazi                                                  |
| 153 | 475  | art, ai, artist, artists, artistic, banana, creative, tool, arts, skill, digital, taped, canvas, technical, artwork, generated, music, creativity, blank, paintings                                                          |

|     |      |                                                                                                                                                                                                               |
|-----|------|---------------------------------------------------------------------------------------------------------------------------------------------------------------------------------------------------------------|
| 154 | 1165 | nuance, lmao, que, thee, upvote, asterick, unironically, es, de, nuanced, autocorrect, spelled, hypocrisy, acronyms, en, jab, mone, autistic, tize, da                                                        |
| 155 | 773  | property, land, ownership, private, rights, labor, owner, violence, natural, owns, defend, theft, contract, owned, rent, taxes, consent, force, enforce, possession                                           |
| 156 | 1094 | laws, legal, illegal, legislation, unconstitutional, enforce, enforced, legally, morality, constitution, court, apply, courts, statute, legality, centralized, crime, applied, jacobson, judges               |
| 157 | 498  | laptop, hunter, emails, biden, giuliani, repair, fbi, rudy, contents, confirmed, verified, hacked, computer, disinformation, drive, joe, fake, email, shop, authentic                                         |
| 158 | 519  | animals, animal, pets, meat, eat, humans, pet, eating, sentient, suffering, mice, dogs, dog, killing, species, consent, pleasure, food, kill, torture                                                         |
| 159 | 586  | bathroom, trans, bathrooms, prisons, prison, cis, woman, men, rooms, restroom, spaces, male, female, restrooms, locker, transwomen, sex, males, transgender, gender                                           |
| 160 | 1466 | trial, guilty, jury, verdict, convicted, charges, murder, innocent, court, chauvin, charged, crime, prosecution, justice, criminal, defense, judge, convict, accused, charge                                  |
| 161 | 929  | freedom, liberty, freedoms, liberties, safety, rights, security, restrictions, tyranny, laws, constitution, autonomy, property, temporary, happiness, responsibility, protect, choices, limits, consequences  |
| 162 | 444  | lindsay, james, pluckrose, helen, twitter, woke, lindsey, crt, discourses, boghossian, mlh, book, lindsays, theories, podcast, marc, phd, tweet, cynical, hegel                                               |
| 163 | 670  | prison, prisons, prisoners, criminals, crime, jail, bail, crimes, inmates, recidivism, private, rehabilitation, offenders, criminal, justice, violent, incarceration, punishment, rehabilitated, profit       |
| 164 | 540  | hunter, biden, joe, son, burisma, kushner, corruption, corrupt, laptop, board, shokin, company, jared, father, president, ivanka, prosecutor, dad, emails, investigating                                      |
| 165 | 878  | bias, biased, biases, confirmation, implicit, unbiased, misinformation, unconscious, neutral, study, objective, cognitive, articles, skepticism, beliefs, unreliable, studies, worldview, algorithm, accuracy |
| 166 | 1043 | tds, derangement, biden, dementia, syndrome, president, debates, decline, cognitive, supporters, mental, joe, stutter, obama, donald, aphasia, presidential, hours, brain, presidency                         |

|     |      |                                                                                                                                                                                                                            |
|-----|------|----------------------------------------------------------------------------------------------------------------------------------------------------------------------------------------------------------------------------|
| 167 | 746  | lockdowns, lockdown, sweden, lock, measures, restrictions, deaths, covid, locked, pandemic, masks, mandates, downs, virus, economy, countries, policies, locking, australia, compliance                                    |
| 168 | 779  | vax, vaxxers, vaxx, vaxxer, antivax, vaccination, antivaxxers, vaccinated, vaush, vaxxed, pro, covid, antivaxxer, mandate, mandates, vaccinations, medical, antivaxx, hoax, unvaccinated                                   |
| 169 | 1730 | articles, headline, title, author, paper, com, posted, quote, linked, misinformation, published, headlines, misleading, shockley, gunn, editor, publication, mikhaila, paragraph, content                                  |
| 170 | 887  | wage, wages, minimum, labor, workers, pay, employees, jobs, paid, worker, price, businesses, market, increase, profit, prices, inflation, productivity, employee, company                                                  |
| 171 | 578  | ngo, andy, antifa, journalist, portland, journalists, violence, attacked, patriot, reporting, prayer, proud, quillette, fa, boys, footage, assaulted, assault, victim, wing                                                |
| 172 | 1185 | wikipedia, citation, citations, links, cite, references, citing, credible, research, google, quote, cited, provided, reliable, refute, academic, linked, reference, linking, page                                          |
| 173 | 625  | alt, lite, spencer, neo, nazi, movement, groypers, wing, milo, gateway, righters, richard, nazis, label, altruism, conservative, sargon, nationalism, nationalists, supremacists                                           |
| 174 | 877  | economics, economists, economic, austrian, economist, economy, sowell, mises, gdp, market, keynesian, trade, keynes, econ, book, growth, empirical, stock, price, trickle                                                  |
| 175 | 606  | holocaust, jews, jewish, camps, nazi, bolshevik, germany, genocide, german, denier, nazis, jew, denial, bolsheviks, million, bolshevism, hitler, concentration, germans, historical                                        |
| 176 | 802  | propaganda, misinformation, disinformation, lies, russian, agenda, spreading, fake, newspeak, spread, brainwashing, manipulation, masses, misleading, brainwashed, narratives, manipulated, ideology, techniques, divisive |
| 177 | 770  | victim, victimhood, shaming, victims, honor, abuse, shame, blaming, responsibility, victimized, oppressed, victimization, guilt, trauma, hurt, complicit, empathy, harmed, honour, bully                                   |
| 178 | 858  | delta, variants, variant, vaccine, virus, vaccinated, vaccines, mutations, infection, immunity, antibodies, mutation, immune, unvaccinated, vaccination, spike, resistant, infected, sars, protein                         |
| 179 | 1479 | vote, voting, electoral, votes, ranked, ec, college, voters, elections, electors, representation, democracy, representatives, candidates, senate, election, candidate, popular, voter, representative                      |

|     |      |                                                                                                                                                                                                 |
|-----|------|-------------------------------------------------------------------------------------------------------------------------------------------------------------------------------------------------|
| 180 | 847  | ford, kavanaugh, investigation, testimony, allegations, fbi, committee, hearings, oath, court, senate, witnesses, trial, hearing, guilty, democrats, lying, accusation, assault, perjury        |
| 181 | 454  | cult, cults, scientology, leader, cultish, religion, member, culty, rand, cultist, atheism, leaders, followers, religions, belief, autistic, mormons, impending, beliefs, ideology              |
| 182 | 721  | generation, gen, boomers, millennials, generations, young, younger, older, age, youth, millennial, boomer, parents, kids, generational, genx, olds, lived, progress, millenials                 |
| 183 | 630  | coup, attempted, overthrow, election, coups, etat, capitol, president, military, insurrection, legal, plan, democracy, attempting, regime, elected, votes, revolution, officials, violent       |
| 184 | 702  | housing, rent, house, home, property, houses, homes, zoning, prices, market, income, landlords, afford, mortgage, buy, renting, rents, rental, price, estate                                    |
| 185 | 1040 | obama, drone, president, strikes, iran, appeasement, peace, isis, military, syria, biden, wars, administration, foreign, yemen, iraq, korea, kurds, civilian, bush                              |
| 186 | 438  | australia, nz, australian, quarantine, australians, zealand, melbourne, lockdown, lockdowns, victoria, maori, camps, aussie, aussies, travelers, covid, vic, hotel, aus, restrictions           |
| 187 | 586  | western, west, civilization, values, roman, rome, huntington, empire, eastern, east, europe, enlightenment, romans, civilizational, european, cultures, countries, greek, greeks, civilizations |
| 188 | 495  | oil, prices, gas, supply, energy, price, production, pipeline, biden, drilling, demand, fuel, keystone, russia, global, barrels, drill, inflation, fossil, crude                                |
| 189 | 631  | pronouns, 16, misgendering, harassment, bill, compelled, pronoun, speech, canadian, peterson, discrimination, gender, court, tribunal, preferred, jail, ohrc, canada, c16, cossman              |
| 190 | 712  | stalin, communism, soviet, communists, communist, nazis, nazism, nazi, ussr, hitler, gulags, million, killed, famine, churchill, germany, mao, union, soviets, millions                         |
| 191 | 493  | murray, douglas, crowds, madness, charles, book, interview, europe, interviews, books, strange, immigration, harris, insinuations, hitchens, identity, ayaan, csc, bell, sam                    |
| 192 | 347  | flat, earth, earthers, round, earther, conspiracy, spherical, burden, malone, sun, model, john, theorists, videos, consensus, youtube, curvature, delusion, shape, theories                     |

|     |      |                                                                                                                                                                                                              |
|-----|------|--------------------------------------------------------------------------------------------------------------------------------------------------------------------------------------------------------------|
| 193 | 561  | ai, agi, intelligence, machine, brain, machines, artificial, humans, computer, neural, algorithm, robot, software, learning, hardware, consciousness, computation, turing, algorithms, programming           |
| 194 | 411  | delta, variant, vaccinated, variants, unvaccinated, viral, mutations, spread, omicron, strain, virus, mutation, alpha, load, breakthrough, contagious, infectious, infected, loads, viruses                  |
| 195 | 1053 | federal, constitution, local, rights, laws, amendment, constitutional, union, governments, powers, legislature, commerce, federalism, united, national, jurisdiction, court, congress, sovereign, interstate |
| 196 | 1303 | violence, wing, terrorism, extremists, violent, attacks, antifa, csis, threat, extremism, terrorist, leftist, shooting, killed, mass, wingers, shooter, domestic, dangers, extremist                         |
| 197 | 539  | colonialism, indigenous, native, land, colonization, british, colonial, natives, europeans, european, colonies, colonized, tribes, colonists, africa, conquest, americans, plymouth, indians, empire         |
| 198 | 1213 | bill, senate, pass, bills, republicans, legislation, congress, stimulus, filibuster, dems, passed, senators, democrats, bipartisan, omnibus, relief, gop, vote, mcconnell, republican                        |
| 199 | 444  | math, mathematics, mathematical, mathematicians, numbers, triangle, symbols, arithmetic, maths, language, abstract, objects, subjective, circle, geometry, degrees, axioms, concepts, universe, beauty       |
| 200 | 883  | vaccinated, vaccination, vax, vaccinations, unvaccinated, vaxxed, covid, mandate, vaccinate, mandates, vaers, vaccinating, testing, status, mandatory, mandated, require, vaxx, unvaxxed, decision           |
| 201 | 716  | terrorism, terrorists, terrorist, domestic, stochastic, terror, violence, threat, blm, violent, civilians, attacks, acts, capitol, antifa, threats, isis, organization, bombings, 11                         |
| 202 | 389  | venezuela, cuba, maduro, chavez, cuban, castro, venezuelan, venezuelans, chile, socialist, latin, regime, sanctions, colombia, cubans, guaido, countries, oil, opposition, haiti                             |
| 203 | 1002 | corporations, companies, corporate, tech, company, corporation, woke, employees, profit, businesses, valley, amazon, market, silicon, capitalism, koch, wing, leftist, thiel, liberals                       |
| 204 | 422  | bot, amp, summon, bots, amputatorbot, canonical, haikusbot, load, fakespot, privacy, faster, reviews, web, opt, optout, detect, page, concerns, controversial, shared                                        |
| 205 | 339  | diet, nutrition, sugar, food, fat, dietary, keto, eat, eating, health, processed, diets, carnivore, nutritional, weight, calories, meat, ede, disease, autism                                                |



|     |     |                                                                                                                                                                                                                                         |
|-----|-----|-----------------------------------------------------------------------------------------------------------------------------------------------------------------------------------------------------------------------------------------|
| 206 | 574 | ct, critique, theorists, frankfurt, structures, crt, theories, postmodernism, horkheimer, lindsay, philosophy, marxism, criticism, science, ideology, pedagogy, critiques, method, critically, book                                     |
| 207 | 765 | offended, offensive, offense, insult, offend, insults, triggered, joke, insulted, upset, language, insulting, offensiveness, jokes, offence, slurs, outrage, comedian, sensitive, reaction                                              |
| 208 | 547 | family, nuclear, families, parent, parents, disrupt, father, mothers, marriage, fathers, divorce, extended, kids, child, mother, household, married, structure, monogamy, raising                                                       |
| 209 | 611 | privacy, surveillance, encryption, tech, digital, nsa, private, phone, companies, snowden, technology, access, tracking, app, patriot, security, transparency, google, spying, backdoor                                                 |
| 210 | 862 | authoritarian, authoritarianism, authoritarians, authority, freedom, totalitarian, dictator, governments, totalitarianism, junta, policies, tendencies, norm, liberty, measures, democracy, opposition, tyranny, force, libertarian     |
| 211 | 382 | japan, japanese, globalism, imperialism, genocidal, western, immigration, empire, abe, imperialists, imperial, asian, nations, china, genocide, countries, globalists, imperialist, empires, pearl                                      |
| 212 | 420 | ads, ad, gillette, advertising, marketing, commercial, advertisement, advertisers, product, masculinity, toxic, behaviour, men, brand, content, gillete, products, cola, advert, coke                                                   |
| 213 | 574 | rationality, irrational, rationally, irrationality, rationalists, rationalism, rationalist, emotions, logical, rationalwiki, reasoning, emotional, rationalize, yudkowsky, emotion, eliezer, intuition, praxeology, rationale, decision |
| 214 | 304 | suicide, suicides, suicidal, men, suicidality, anorexia, males, depression, male, rates, rate, commit, questionnaire, feelings, mental, deaths, kill, sommers, attempts, die                                                            |
| 215 | 550 | covid, 19, polio, pandemic, contagious, covidiot, catching, booster, denier, mild, covidian, unvaccinated, deadly, lockdowns, covidians, psychosis, spread, illogical, tired, dying                                                     |
| 216 | 489 | unions, union, workers, labor, strike, company, worker, employees, bargaining, striking, jobs, unionized, companies, employer, teachers, contract, employers, wages, pay, sector                                                        |
| 217 | 785 | removed, contribution, mods, deleted, content, removal, violation, moderators, deemed, user, users, attacks, quality, adding, mod, standards, substance, contributing, removing, hominem                                                |
| 218 | 329 | klein, ezra, vox, harris, sam, haidt, podcast, sullivan, interview, ethan, bigoteer, murray, identity, listening, charles, dishonest, conversations, ben, shapiro, justice                                                              |

|     |      |                                                                                                                                                                                                                                    |
|-----|------|------------------------------------------------------------------------------------------------------------------------------------------------------------------------------------------------------------------------------------|
| 219 | 919  | nazis, supremacists, condemn, neo, wallace, supremacy, rally, proud, boys, condemned, antifa, stand, charlottesville, nazi, march, statue, marching, violence, nationalists, denounce                                              |
| 220 | 361  | discord, server, join, meetup, invite, meetups, chat, dm, angeles, los, club, conversations, pm, topics, channel, portal, discussions, podcast, hour, hi                                                                           |
| 221 | 2024 | movement, movements, activism, activists, activist, blm, ideology, radical, protests, progressive, protest, revolution, woke, collective, leaders, institutions, goals, progress, oppression, status                               |
| 222 | 298  | statues, statue, confederate, monuments, jefferson, columbus, erected, washington, slavery, monument, symbol, museum, toppling, slaves, celebrate, slave, historical, tear, celebrating, removing                                  |
| 223 | 474  | crt, cr, taught, proponents, schools, rufo, delgado, academic, cringe, bell, advocates, wikipedia, school, teaching, lens, define, elementary, grows, diangelo, scholars                                                           |
| 224 | 744  | immunity, natural, immune, antibodies, infection, cells, antibody, covid, herd, memory, vaccine, vaccinated, disease, vaccination, infected, virus, protection, pathogen, sars, vaccines                                           |
| 225 | 1330 | democrats, party, republicans, voters, democratic, blacks, mlk, republican, civil, whites, racist, democrat, vote, southern, king, racial, negro, rights, race, americans                                                          |
| 226 | 857  | hierarchy, utopia, bookchin, hierarchies, utopian, ecology, hierarchical, nature, societies, ecological, domination, systems, forms, humans, ideal, emergence, development, vision, resources, humanity                            |
| 227 | 429  | fraud, court, courts, fraudulent, lawsuits, giuliani, widespread, dominion, baseless, audits, allegations, alleging, testimony, audit, customer, proven, sourced, corruption, irregularities, fake                                 |
| 228 | 238  | beep, boop, robot, bot, copy, info, books, republic, manifesto, 1984, frankenstein, das, koran, kapital, communist, leviathan, heidi, punishment, macbeth, bop                                                                     |
| 229 | 388  | homeless, homelessness, housing, cities, shelter, mental, city, addiction, streets, drug, addicts, shelters, drugs, poverty, rent, la, sf, san, food, health                                                                       |
| 230 | 422  | ted, unsubstantiated, unvaccinated, tweeted, misinterpreted, tedious, obligated, retweeted, convoluted, kaczynski, cruz, uninterested, substantiated, solicited, envy, indoctrinated, farted, advice, unsolicited, unsophisticated |
| 231 | 294  | jordan, jordanpeterson, jbp, interview, jordans, atheist, jp, hall, peterson, milo, lectures, talks, futurist, message, podcast, metaphysical, sam, jordanbpeteron, helped, vibe                                                   |

|     |      |                                                                                                                                                                                                                |
|-----|------|----------------------------------------------------------------------------------------------------------------------------------------------------------------------------------------------------------------|
| 232 | 382  | dave, daverubin, guests, interview, joe, chappelle, rogan, guest, rubin, sam, interviews, seder, interviewer, chapelle, criticism, ana, ruben, comedy, molyneux, ben                                           |
| 233 | 628  | fertility, kids, population, birth, rates, child, growth, babies, birthrates, countries, replacement, eugenics, family, parental, decline, reproduce, rate, birthrate, overpopulation, families                |
| 234 | 404  | bret, vaccines, ivermectin, vaccine, brett, covid, heather, roulette, ivm, sam, podcast, weinstein, safe, vaccinated, effective, risks, vax, study, kory, russian                                              |
| 235 | 1486 | technology, progress, technological, humanity, tech, civilization, technologies, humans, global, century, innovation, species, growth, wisdom, collapse, planet, optimistic, systems, energy, resources        |
| 236 | 1491 | vaccinated, virus, infected, unvaccinated, infection, covid, spread, viral, vaccination, symptoms, transmission, asymptomatic, load, viruses, pcr, infections, infectious, immunity, disease, sick             |
| 237 | 342  | hat, nfl, maga, kneeling, anthem, wearing, kaepernick, hats, wear, shirt, nike, hijab, colin, players, knee, symbol, flag, kneel, football, protest                                                            |
| 238 | 676  | trans, rowling, jk, transphobic, woman, gender, transgender, sex, biological, book, menstruate, female, transphobia, identity, shriner, activists, transition, men, lgbt, walsh                                |
| 239 | 792  | racist, native, racism, cherokee, fragility, warren, race, woman, color, book, ancestry, skin, diangelo, whites, racial, blackface, indian, colour, racially, whiteness                                        |
| 240 | 931  | oppression, minority, minorities, oppressed, oppressive, injustice, marginalized, tyranny, rights, whites, dominant, privilege, ethnic, discrimination, race, identity, dominance, oppress, equal, oppressor   |
| 241 | 773  | lobbying, politicians, lobbyists, donations, campaign, bribery, corruption, politician, donate, pacs, corporations, campaigns, donors, pac, congress, elected, lobbyist, candidates, bribe, candidate          |
| 242 | 671  | hospitals, hospital, beds, icu, patients, hospitalizations, covid, nurses, hospitalization, unvaccinated, capacity, vaccinated, overwhelmed, hospitalized, staff, bed, numbers, medical, healthcare, surgeries |
| 243 | 297  | france, french, muslims, macron, muslim, islam, islamic, revolution, condemn, paris, republic, attacks, islamist, secular, beheading, christchurch, king, hebdo, charlie, terrorism                            |
| 244 | 514  | jp, friendship, sil, wife, jerk, boundaries, relationship, blocked, uncomfortable, exfriend, trans, exfriended, subreddit, emotional, sister, friendships, advice, girlfriend, nazi, offended                  |

|     |      |                                                                                                                                                                                                                |
|-----|------|----------------------------------------------------------------------------------------------------------------------------------------------------------------------------------------------------------------|
| 245 | 671  | cultural, wars, conservative, counterculture, fighting, appropriation, outrage, conservatives, divide, crt, cancel, conflict, twitter, topics, counter, conquer, win, cold, mainstream, online                 |
| 246 | 1076 | school, students, teachers, schools, teacher, crt, teaching, taught, bill, teach, curriculum, race, parents, kids, racist, student, discomfort, board, education, classroom                                    |
| 247 | 406  | nationalism, patriotism, nation, nationalist, national, ethnic, proud, patriot, exceptionalism, nationalists, identity, patriotic, european, civic, patriots, pride, nations, nationalistic, values, diversity |
| 248 | 494  | military, army, combat, soldiers, draft, service, conscription, marine, veterans, marines, join, vets, wars, troops, recruits, soldier, men, corps, enlist, iraq                                               |
| 249 | 516  | justice, sjw, sjws, warrior, movement, ideology, warriors, injustice, progressivism, solidarity, progressive, equality, rights, civil, lindsay, values, racism, movements, discrimination, pluckrose           |
| 250 | 273  | benzos, benzo, addiction, prescribed, addicted, withdrawal, anxiety, taper, drugs, peterson, detox, addict, coma, benzodiazepines, daughter, turkey, wife, mikhaila, drug, rehab                               |
| 251 | 341  | korea, north, vietnam, nk, korean, south, marines, naval, china, koreans, troops, yeonmi, defectors, park, land, forces, japan, vietnamese, khmer, panama                                                      |
| 252 | 197  | boop, beep, robot, bot, copy, info, bible, books, quran, comics, robots, intend, promote, leaving, , , , ,                                                                                                     |
| 253 | 300  | ad, hominem, hom, hominem, homs, fallacy, insult, character, attacks, fallacies, attacking, maher, insults, fallacious, adl, mod, logical, cursewords, interlocutor, insulting                                 |
| 254 | 460  | college, degrees, education, jobs, school, graduates, graduate, university, majors, certifications, engineering, bachelor, debt, skills, educated, colleges, career, students, require, trades                 |
